# Supplementary material
Source: publisher figshare collection journal article supplement (https://frontiersin.figshare.com/ndownloader/files/34738255)
Supplement: Supplementary file [file 34738255]

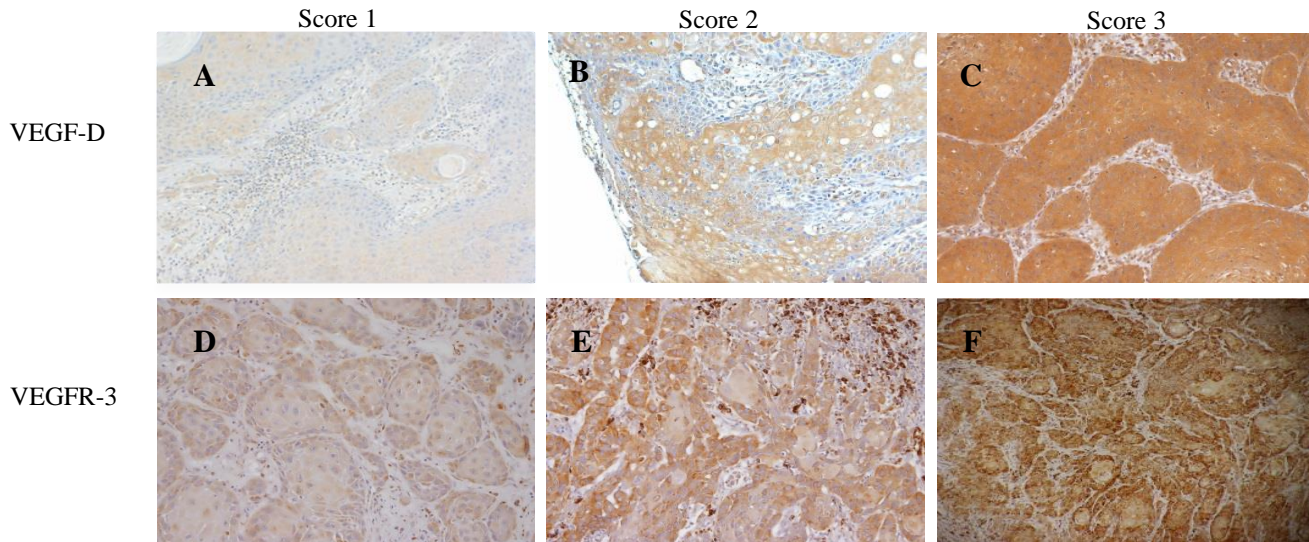

**Figure S1.** Representative immunohistochemical staining for VEGF-D and VEGFR-3 in vulvar invasive squamous cell carcinoma. Magnification 20x. VEGF-D positive staining was scored 1+ (A), 2+ (B) and 3+ (C) in 24.5%, 53.1% and 14.3% of VSCC primary tissues, respectively. VEGFR-3 positive staining was scored 1+ (D), 2+ (E) and 3+ (F) in 46.9%, 44.9% and 2.0% of VSCC primary tissues, respectively.
